# Supplementary material for: Enzyme-catalyzed synthesis of malonate polyesters and their use as metal chelating materials
Source: Royal Society of Chemistry journal article supplement (doi:10.1039/d1gc01783g), 2021-01-01
Supplement: d1gc01783g1.pdf [file d1gc01783g1.pdf]

# Electronic Supplementary Information

Enzyme-catalyzed synthesis of malonate polyesters and their use as metal chelating materials

Fergal P. Byrne<sup>1,\*</sup>, Jamie M. Z. Assemat<sup>1</sup>, Amy E. Stanford<sup>1</sup>, Thomas J. Farmer<sup>1</sup>, James W. Comerford<sup>1,2</sup>, Alessandro Pellis<sup>1,3,\*</sup>

<sup>1</sup>. University of York, Department of Chemistry, Green Chemistry Centre of Excellence, YO10 5DD, Heslington, York, UK

<sup>2</sup> SINTEF, Forskningsveien 1A, 0373, Oslo, Norway

<sup>3</sup> University of Natural Resources and Life Sciences, Vienna, Department of Agrobiotechnology, Institute of Environmental Biotechnology, Konrad Lorenz Strasse 20, 3430, Tulln an der Donau, Austria

\* Correspondence to: Dr. Alessandro Pellis, [alessandro.pellis@boku.ac.at](mailto:alessandro.pellis@boku.ac.at) and Dr. Fergal Byrne, [fergal.byrne@york.ac.uk](mailto:fergal.byrne@york.ac.uk)

## Materials and methods

### Chemicals and enzymes

All chemicals, monomers and enzymes were purchased from Sigma-Aldrich and used as received if not otherwise specified. *Candida antarctica* lipase B immobilized on a macroporous acrylic resin was purchased from Sigma-Aldrich (product code: L4777).

### Chemocatalytic synthesis

38 mmols (5.01 g) of dimethyl malonate was added to a flask along with 47.5 mmols (4.28 g) 1,4-butanediol and 1 mol% of the metal catalyst and a magnetic stirrer bar. A short path distillation arm and condenser was connected and the whole system was evacuated to 1 mbar and backfilled with argon four times. The flask was then heated to 150 °C under argon, stirring at 300 rpm. After 5 hours the temperature was increased to 180 °C for 1 hour followed by application of 200 mbar vacuum overnight. After 17 hours the flask was removed from the heat and back filled with argon before

analysis. The polymers appearances were a fluid white paste or a sticky yellowish liquid when  $\text{Sb}_2\text{O}_3$  or  $\text{Ti}(\text{iv})$  tetra*tert*-butoxide were used as the catalyst, respectively.

#### Biocatalyzed synthesis

0.006 mol of diester and 0.006 mol of diol (diester:diol ratio= 1.0:1.0) were added in a 25-mL round bottom flask. The mixture was then stirred at 85 °C until a homogeneous melt was obtained. 10% w w<sup>-1</sup> (calculated on the total amount of the monomers) of iCaLB was then added and the reaction was run for 6 h at 1000 mbar. A vacuum of 20 mbar was subsequently applied for additional 18 h maintaining the reaction T at 85 °C. The reaction products were dissolved in MeTHF and the biocatalyst filtered off. The solvent was then removed via rotary evaporation and the products mixture analyzed without carrying our any additional purification steps.

#### Chelation experiments

Equal volumes (0.75 mL) of polymer-containing organic solution (0.05 M) and an aqueous metal solution (0.25 M  $\text{NH}_3$ , 0.05 M metal salt) were added to a vial. The pH of the aqueous solution was controlled by the addition of HCl. The mixture was shaken and allowed to stand for at least 1 hour (no change was observed between standing for 1 hour or overnight), before centrifuging (3,500 rpm, 4 minutes, 20 °C). Aliquots of 0.2 mL or 0.4 mL were taken from the aqueous layer for analysis by UV-vis. spectroscopy. Dilutions were made as necessary prior to analysis.

#### Nuclear Magnetic Resonance (NMR)

<sup>1</sup>H-NMR spectroscopy was performed on a JEOL JNM-ECS400A spectrometer at a frequency of 400 MHz.  $\text{CDCl}_3$  was used as the NMR solvent for all synthesized polymers.

#### Gel Permeation Chromatography (GPC)

Polymeric samples were diluted in THF at a concentration of ~2 mg mL<sup>-1</sup>. ~5 µL of toluene were added in each sample as internal standard. GPC runs were carried out using a PSS SDV High set composed of 3 analytical columns (300 × 8 mm, particle diameter 5 µm) of 1000, 105 and 106 Å pore sizes with a PSS guard column (Polymer Standards Service GmbH) installed in a PSS SECcurity SEC system. Elution was

carried out using THF as the mobile phase ( $1 \text{ mL min}^{-1}$ ). Column temperature was maintained at  $23 \text{ }^{\circ}\text{C}$  and detection was performed by refractive index detector. Elution time was of 50 min. Calibration was carried out in the molecular weight range 370-2520000 Da using the ReadyCal polystyrene standards supplied by Sigma Aldrich and referenced to the toluene peak.

## Supplementary Figures

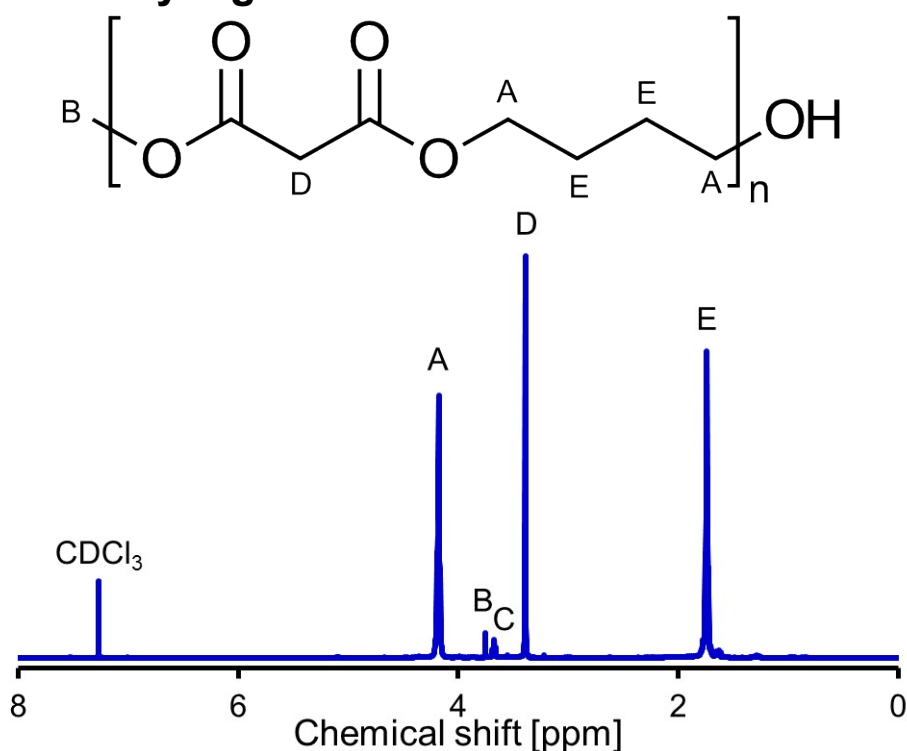

**Figure S1.** <sup>1</sup>H-NMR spectrum of the reaction between dimethyl malonate (DMM) and 1,4-butanediol (BDO) catalyzed by iCaLB. B: unreacted or terminal -OCH<sub>3</sub> groups from DMM; C: unreacted or terminal CH<sub>2</sub>-CH<sub>2</sub>-OH from BDO.

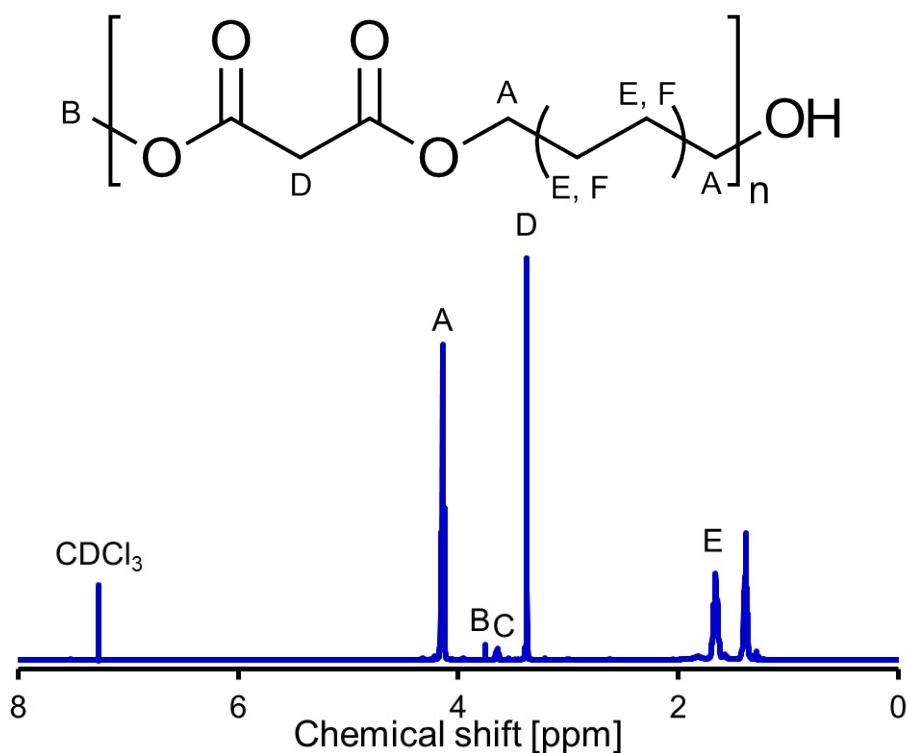

**Figure S2.** <sup>1</sup>H-NMR spectrum of the reaction between dimethyl malonate (DMM) and 1,6-hexanediol (HDO) catalyzed by iCaLB. B: unreacted or terminal -OCH<sub>3</sub> groups from DMM; C: unreacted or terminal CH<sub>2</sub>-CH<sub>2</sub>-OH from HDO.

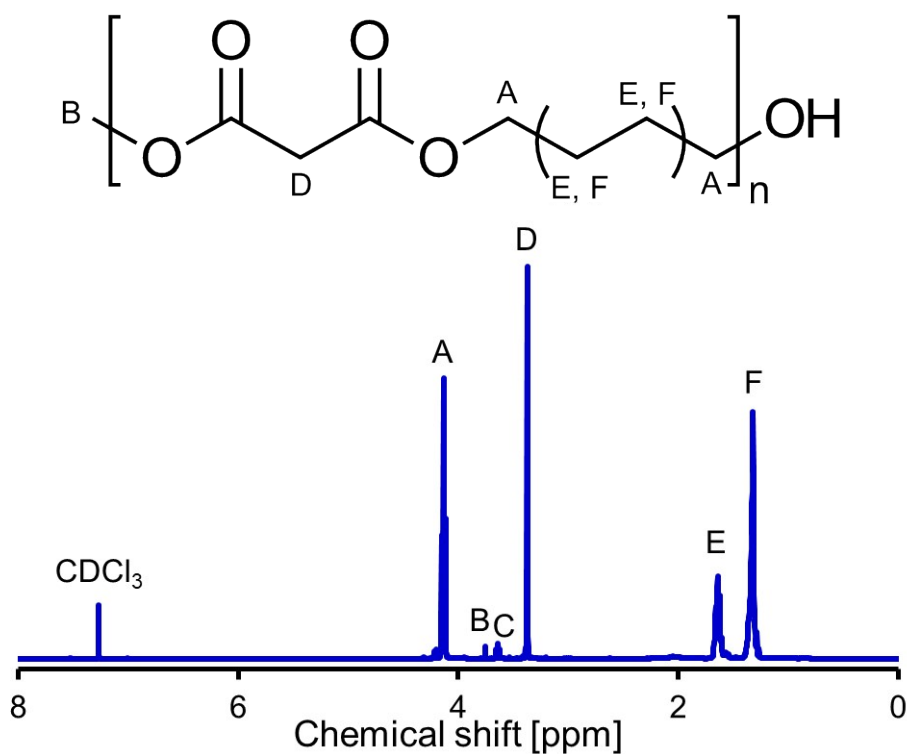

**Figure S3.** <sup>1</sup>H-NMR spectrum of the reaction between dimethyl malonate (DMM) and 1,8-octanediol (ODO) catalyzed by iCaLB. B: unreacted or terminal -OCH<sub>3</sub> groups from DMM; C: unreacted or terminal CH<sub>2</sub>-CH<sub>2</sub>-OH from ODO.

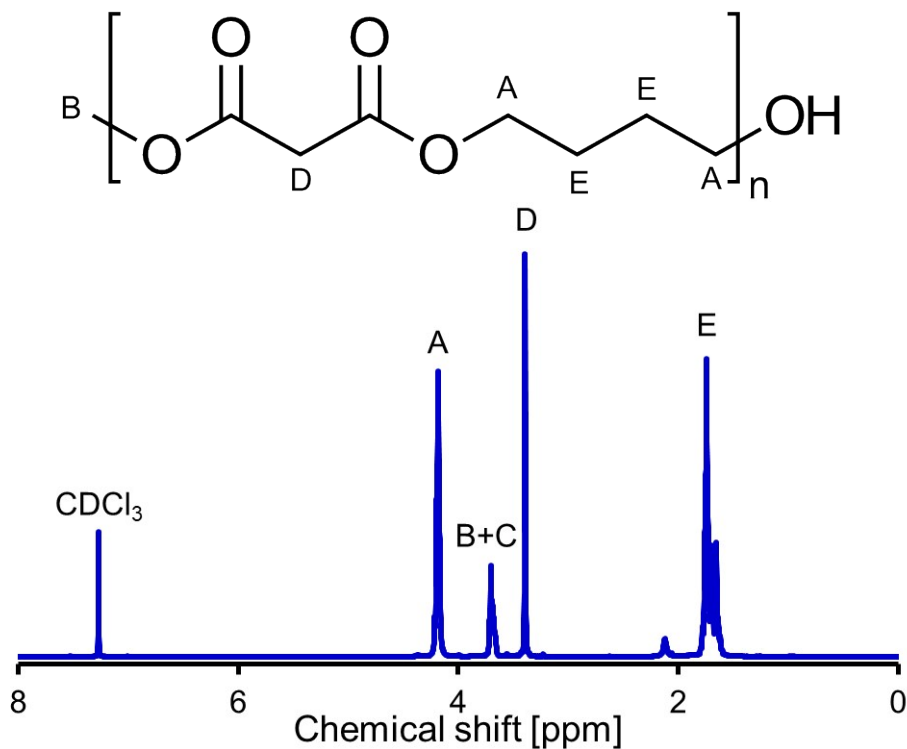

**Figure S4.** <sup>1</sup>H-NMR spectrum of the reaction between dimethyl malonate (DMM) and 1,4-butanediol (BDO) catalyzed by Sb<sub>2</sub>O<sub>3</sub>. B: unreacted or terminal -OCH<sub>3</sub> groups from DMM; C: unreacted or terminal CH<sub>2</sub>-CH<sub>2</sub>-OH from BDO.

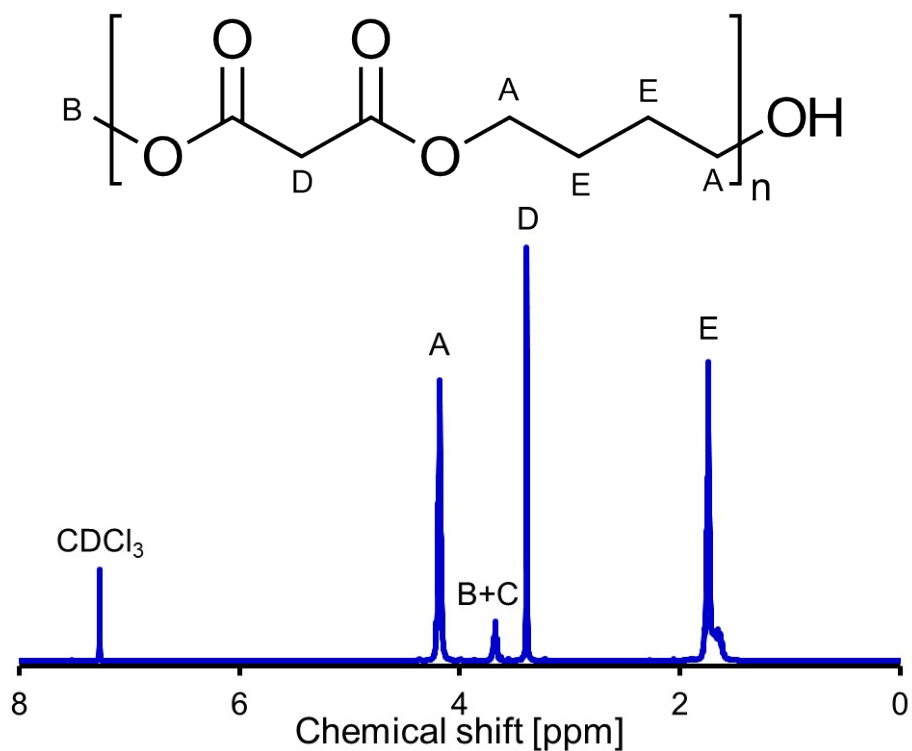

**Figure S5.**  $^1\text{H-NMR}$  spectrum of the reaction between dimethyl malonate (DMM) and 1,4-butanediol (BDO) catalyzed by  $\text{Ti}(\text{O}i\text{Bu})_4$ . B: unreacted or terminal  $-\text{OCH}_3$  groups from DMM; C: unreacted or terminal  $\text{CH}_2-\text{CH}_2-\text{OH}$  from BDO.

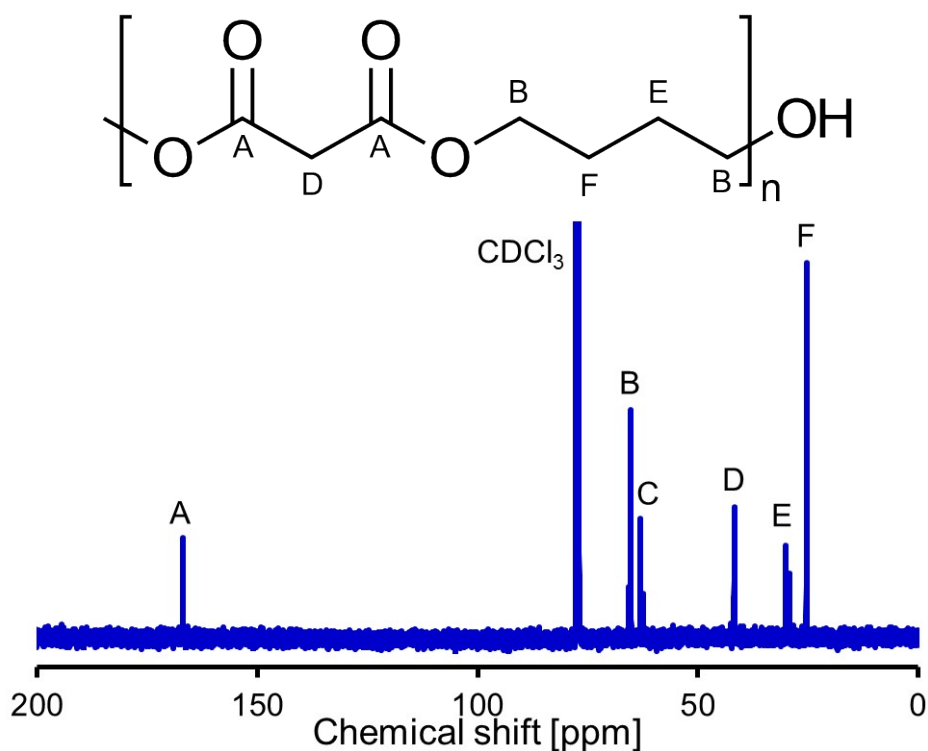

**Figure S6.**  $^{13}\text{C-NMR}$  spectrum of the reaction between dimethyl malonate (DMM) and 1,4-butanediol (BDO) catalyzed by  $\text{Sb}_2\text{O}_3$ .

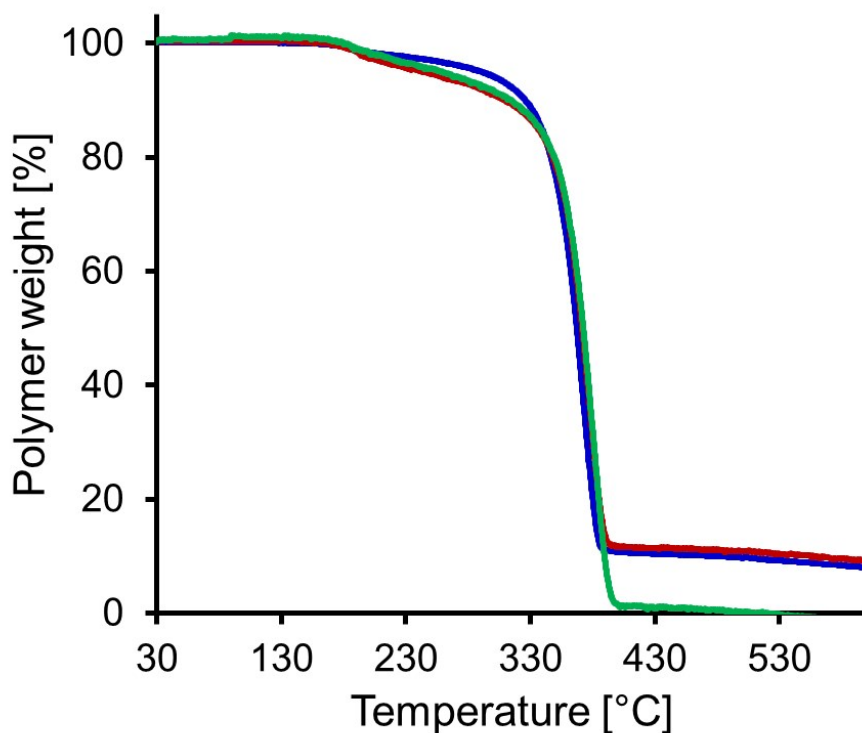

**Figure S7.** Thermogravimetric analysis of the enzymatically synthesized polyesters. The  $T_{d_{50}}$  values based on the different diols' chain length were: BDO (blue): 367 °C, HDO (green): 372°C, ODO (red): 373°C.

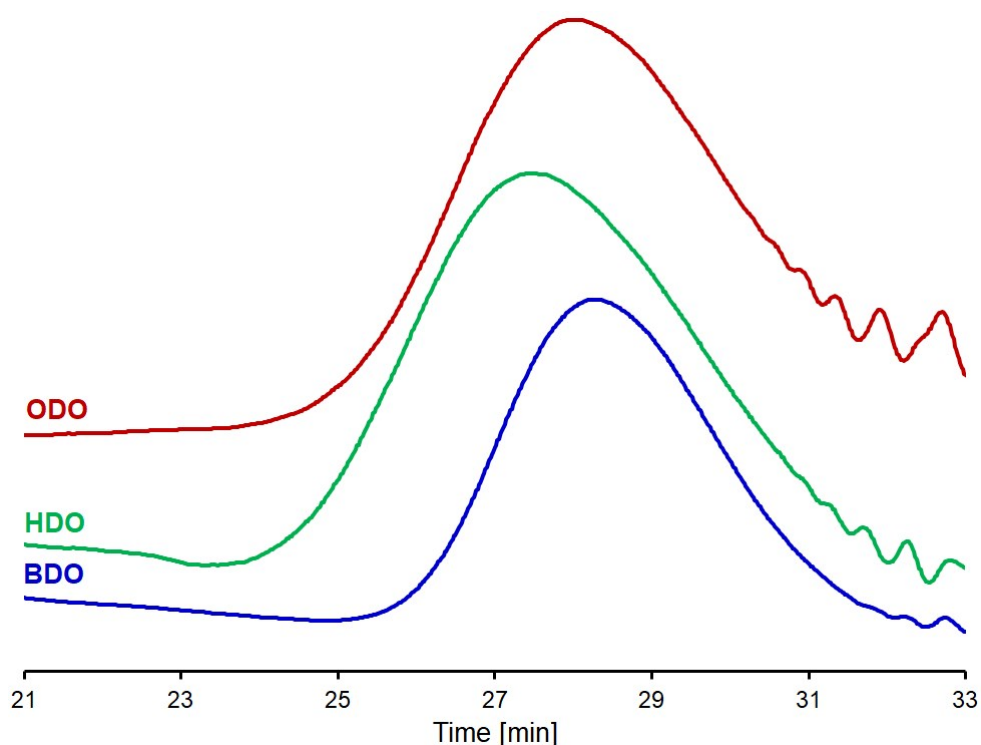

**Figure S8.** Gel permeation chromatography of the enzymatically synthesized polymers using BDO (blue), HDO (green) and ODO (red).

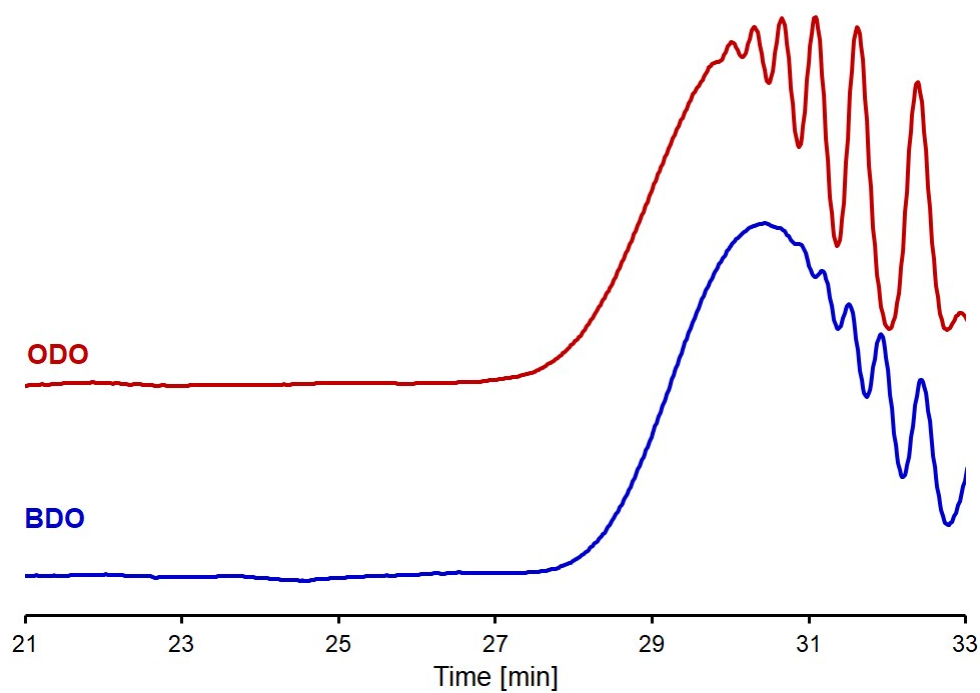

**Figure S9.** Gel permeation chromatography of the  $\text{Sb}_2\text{O}_3$  synthesized polymers using BDO (blue) and ODO (red).

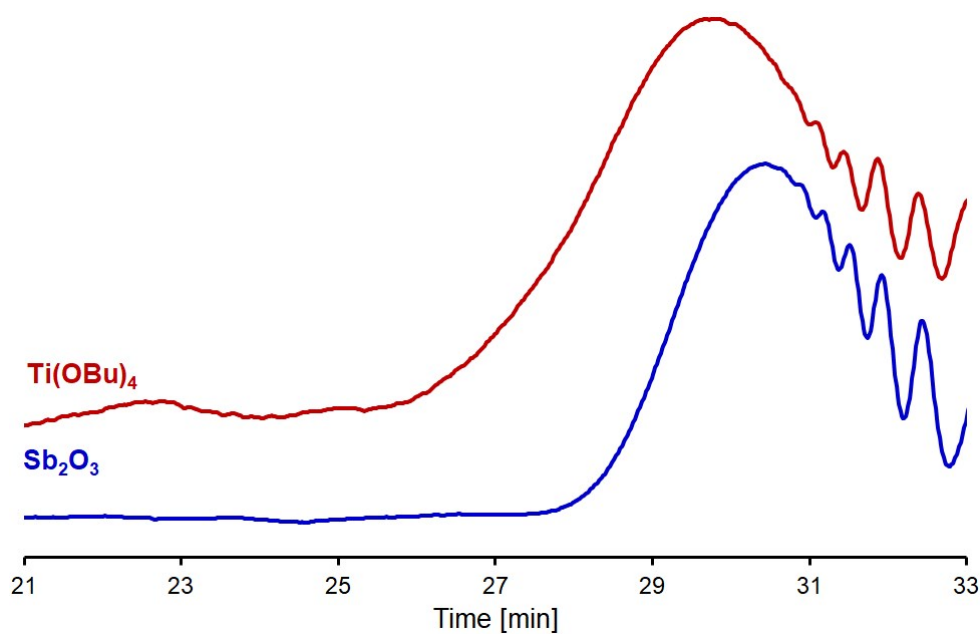

**Figure S10.** Gel permeation chromatography of the  $\text{Sb}_2\text{O}_3$  (blue) and  $\text{Ti}(\text{OBu})_4$  (red) synthesized polymers using BDO as the diol.



## Supplementary Tables

**Table S1.** Summary of the gel permeation chromatography analysis performed on all synthesized malonate-based polymers.

| Diol    | Catalyst                       | GPC           |               |           |
|---------|--------------------------------|---------------|---------------|-----------|
|         |                                | $M_n$<br>[Da] | $M_w$<br>[Da] | $\bar{D}$ |
| 1,4-BDO | Sb <sub>2</sub> O <sub>3</sub> | 2100          | 4000          | 1.90      |
|         | Ti(OBu) <sub>4</sub>           | 2600          | 4600          | 1.79      |
| 1,8-ODO | Sb <sub>2</sub> O <sub>3</sub> | 1000          | 2400          | 2.28      |
|         |                                | 1600          | 2800          | 1.68      |
| 1,4-BDO | iCaLB                          | 5400          | 8400          | 1.55      |
|         |                                | 6500          | 10200         | 2.00      |
| 1,6-HDO |                                | 6700          | 13000         | 1.94      |
|         |                                | 6300          | 14400         | 2.30      |
| 1,8-ODO |                                | 6600          | 12700         | 1.93      |
|         |                                | 5700          | 11400         | 2.28      |

**Table S2.** Chelation data for the BDO MAL polymer.

| HCl / M | pH    | Abs. / % | $\lambda_{max}$ / nm | $\epsilon$ / dm <sup>3</sup><br>mol <sup>-1</sup><br>cm <sup>-1</sup> | [CuCl <sub>2</sub> ] /<br>M | Initial<br>[CuCl <sub>2</sub> ] /<br>M | Extr. / % | s   | M    | $\mu$ |
|---------|-------|----------|----------------------|-----------------------------------------------------------------------|-----------------------------|----------------------------------------|-----------|-----|------|-------|
| 0.00    | 12.25 | 1.199    | 622                  | 55.49                                                                 | 0.0432                      | 0.0461                                 | 6.3       | 2.1 | 3.0  | 3.9   |
|         | 12.25 | 1.242    | 619                  | 55.49                                                                 | 0.0448                      | 0.0461                                 | 3.0       |     |      |       |
|         | 12.25 | 1.248    | 621                  | 55.49                                                                 | 0.0450                      | 0.0461                                 | 2.5       |     |      |       |
| 0.25    | 10.98 | 1.206    | 616                  | 56.04                                                                 | 0.0430                      | 0.0486                                 | 11.5      | 2.7 | 9.8  | 9.2   |
|         | 10.98 | 1.230    | 616                  | 56.04                                                                 | 0.0439                      | 0.0486                                 | 9.8       |     |      |       |
|         | 10.98 | 1.278    | 616                  | 56.04                                                                 | 0.0456                      | 0.0486                                 | 6.3       |     |      |       |
| 0.75    | 10.36 | 1.212    | 615                  | 56.65                                                                 | 0.0428                      | 0.0504                                 | 15.1      | 4.8 | 15.1 | 15.7  |
|         | 10.36 | 1.131    | 614                  | 56.65                                                                 | 0.0400                      | 0.0504                                 | 20.8      |     |      |       |
|         | 10.36 | 1.269    | 615                  | 56.65                                                                 | 0.0448                      | 0.0504                                 | 11.2      |     |      |       |
| 2.00    | 9.22  | 1.307    | 598                  | 54.72                                                                 | 0.0478                      | 0.0491                                 | 2.7       |     |      |       |
|         | 9.22  | 1.275    | 598                  | 54.72                                                                 | 0.0466                      | 0.0491                                 | 5.1       |     |      |       |
|         | 9.22  | 1.297    | 598                  | 54.72                                                                 | 0.0474                      | 0.0491                                 | 3.4       |     |      |       |
| 2.54    | 8.43  | 1.275    | 598                  | 52.58                                                                 | 0.0485                      | 0.0503                                 | 3.6       | 0.4 | 3.6  | 3.8   |
|         | 8.43  | 1.266    | 597                  | 52.58                                                                 | 0.0481                      | 0.0503                                 | 4.2       |     |      |       |
|         | 8.43  | 1.274    | 597                  | 52.58                                                                 | 0.0485                      | 0.0503                                 | 3.6       |     |      |       |

**Table S3.**Chelation data for the ODO MAL polymer.

| HCl / M | pH    | Abs. / % | $\lambda_{\max}$ / nm | $\epsilon$ / dm <sup>3</sup><br>mol <sup>-1</sup><br>cm <sup>-1</sup> | [CuCl <sub>2</sub> ] /<br>M | Initial<br>[CuCl <sub>2</sub> ] /<br>M | Extr. / % | s   | M    | $\mu$ |
|---------|-------|----------|-----------------------|-----------------------------------------------------------------------|-----------------------------|----------------------------------------|-----------|-----|------|-------|
| 0.00    | 12.25 | 0.594    | 610                   | 55.49                                                                 | 0.0428                      | 0.0461                                 | 7.1       | 4.3 | 14.5 | 12.1  |
|         | 12.25 | 0.592    | 609                   | 55.49                                                                 | 0.0427                      | 0.0461                                 | 14.7      |     |      |       |
|         | 12.25 | 0.593    | 610                   | 55.49                                                                 | 0.0427                      | 0.0461                                 | 14.5      |     |      |       |
| 0.40    | 10.82 | 0.602    | 607                   | 55.82                                                                 | 0.0431                      | 0.0479                                 | 9.9       | 1.7 | 11.1 | 11.1  |
|         | 10.82 | 0.612    | 606                   | 55.82                                                                 | 0.0439                      | 0.0479                                 | 12.3      |     |      |       |
| 1.00    | 10.25 | 1.184    | 612                   | 56.54                                                                 | 0.0419                      | 0.0488                                 | 16.2      | 9.1 | 22.7 | 22.7  |
|         | 10.25 | 1.002    | 612                   | 56.54                                                                 | 0.0355                      | 0.0488                                 | 29.1      |     |      |       |
| 2.00    | 9.22  | 1.255    | 598                   | 54.72                                                                 | 0.0459                      | 0.0491                                 | 8.3       | 1.8 | 7.0  | 7.0   |
|         | 9.22  | 1.289    | 598                   | 54.72                                                                 | 0.0471                      | 0.0491                                 | 5.8       |     |      |       |
| 2.54    | 8.43  | 1.267    | 598                   | 52.58                                                                 | 0.0482                      | 0.0503                                 | 4.2       | 1.2 | 4.2  | 3.5   |
|         | 8.43  | 1.259    | 596                   | 52.58                                                                 | 0.0479                      | 0.0503                                 | 4.3       |     |      |       |
|         | 8.43  | 1.287    | 598                   | 52.58                                                                 | 0.0489                      | 0.0503                                 | 2.1       |     |      |       |
